# Supplementary material for: Discovery and Characterization of Genes Conferring Natural Resistance to the Antituberculosis Antibiotic Capreomycin
Source: Research Square preprint supplement (doi:10.21203/rs.3.rs-2861654/v1), 2023-05-13
Supplement: Supplementary file 1 [file 9a0dcfd51dee03f0ed719f15.xlsx]

## Sheet: Figure 3b
	Cph001 (inactive)+CMN llA+ATP						Cph+CMN llA+ATP						Cph001+CMN llA+ATP						Cph001D189N+CMN llA+ATP						Cph001D189A+CMN llA+ATP						Cph001+VIO+ATP						Cph001+Kan+ATP						Cph001+Ery+ATP
Time	Triplicate				Error bar (SD)		Triplicate				Error bar (SD)		Triplicate				Error bar (SD)		Triplicate				Error bar (SD)		Triplicate				Error bar (SD)		Triplicate				Error bar (SD)		Triplicate				Error bar (SD)		Triplicate				Error bar (SD)
	1	2	3	Average	Max. Average	Min. Avarage	1	2	3	Average	Max. Average	Min. Avarage	1	2	3	Average	Max. Average	Min. Avarage	1	2	3	Average	Max. Average	Min. Avarage	1	2	3	Average	Max. Average	Min. Avarage	1	2	3	Average	Max. Average	Min. Avarage	1	2	3	Average	Max. Average	Min. Avarage	1	2	3	Average	Max. Average	Min. Avarage
00:00:00	1.498	1.444	1.542	1.49467	0.0473333	0.0506667	1.498	1.444	1.542	1.49467	0.0473333	0.0506667	1.498	1.444	1.542	1.49467	0.0473333	0.0506667	1.498	1.444	1.542	1.49467	0.0473333	0.0506667	1.498	1.444	1.542	1.49467	0.0473333	0.0506667	1.498	1.444	1.542	1.49467	0.0473333	0.0506667	1.498	1.444	1.542	1.49467	0.0473333	0.0506667	1.498	1.444	1.542	1.49467	0.0473333	0.0506667
00:01:00	1.561	1.4	1.426	1.46233	0.0986667	0.0623333	1.319	1.356	1.462	1.379	0.083	0.06	1.312	1.213	1.307	1.27733	0.0346667	0.0643333	1.553	1.506	1.601	1.55333	0.0476667	0.0473333	1.545	1.487	1.414	1.482	0.063	0.068	1.451	1.481	1.612	1.51467	0.0973333	0.0636667	1.577	1.523	1.621	1.57367	0.0473333	0.0506667	1.559	1.525	1.603	1.56233	0.0406667	0.0373333
00:02:00	1.504	1.495	1.41	1.46967	0.0343333	0.0596667	1.128	1.213	1.315	1.21867	0.0963333	0.0906667	0.938	0.897	0.966	0.933667	0.0323333	0.0366667	1.587	1.547	1.639	1.591	0.048	0.044	1.561	1.525	1.425	1.50367	0.0573333	0.0786667	1.401	1.447	1.574	1.474	0.1	0.073	1.6	1.546	1.644	1.59667	0.0473333	0.0506667	1.576	1.539	1.62	1.57833	0.0416667	0.0393333
00:03:00	1.491	1.519	1.419	1.47633	0.0426667	0.0573333	0.935	1.044	1.155	1.04467	0.110333	0.109667	0.675	0.652	0.675	0.667333	0.00766667	0.0153333	1.625	1.57	1.671	1.622	0.049	0.052	1.56	1.583	1.503	1.54867	0.0343333	0.0456667	1.2854	1.361	1.487	1.3778	0.1092	0.0924	1.606	1.552	1.65	1.60267	0.0473333	0.0506667	1.592	1.549	1.636	1.59233	0.0436667	0.0433333
00:04:00	1.548	1.556	1.41	1.50467	0.0513333	0.0946667	0.746	0.854	0.95	0.85	0.1	0.104	0.58	0.567	0.559	0.568667	0.0113333	0.00966667	1.658	1.6	1.706	1.65467	0.0513333	0.0546667	1.565	1.628	1.53	1.57433	0.0536667	0.0443333	1.2684	1.258	1.364	1.2968	0.0672	0.0388	1.608	1.554	1.652	1.60467	0.0473333	0.0506667	1.598	1.556	1.642	1.59867	0.0433333	0.0426667
00:05:00	1.485	1.546	1.394	1.475	0.071	0.081	0.562	0.647	0.727	0.645333	0.0816667	0.0833333	0.531	0.503	0.526	0.52	0.011	0.017	1.691	1.63	1.734	1.685	0.049	0.055	1.572	1.657	1.534	1.58767	0.0693333	0.0536667	1.2514	1.134	1.267	1.21747	0.0495333	0.0834667	1.607	1.553	1.651	1.60367	0.0473333	0.0506667	1.609	1.563	1.653	1.60833	0.0446667	0.0453333
00:06:00	1.503	1.548	1.394	1.48167	0.0663333	0.0876667	0.394	0.43	0.521	0.448333	0.0726667	0.0543333	0.356	0.3295	0.507	0.3975	0.1095	0.068	1.725	1.645	1.758	1.70933	0.0486667	0.0643333	1.563	1.68	1.546	1.59633	0.0836667	0.0503333	0.9414	0.94	1.155	1.01213	0.142867	0.0721333	1.599	1.545	1.643	1.59567	0.0473333	0.0506667	1.623	1.57	1.667	1.62	0.047	0.05
00:07:00	1.523	1.539	1.382	1.48133	0.0576667	0.0993333	0.265	0.269	0.375	0.303	0.072	0.038	0.2365	0.223	0.392667	0.284056	0.108611	0.0610556	1.76	1.659	1.78	1.733	0.047	0.074	1.547	1.701	1.557	1.60167	0.0993333	0.0546667	0.7824	0.7631	0.907	0.8175	0.0895	0.0544	1.5565	1.54	1.638	1.57817	0.0598333	0.0381667	1.625	1.571	1.669	1.62167	0.0473333	0.0506667
00:08:00	1.412	1.535	1.342	1.42967	0.105333	0.0876667	0.199	0.184	0.281	0.221333	0.0596667	0.0373333	0.1745	0.1675	0.271333	0.204444	0.0668889	0.0369444	1.789	1.677	1.8	1.75533	0.0446667	0.0783333	1.544	1.722	1.569	1.61167	0.110333	0.0676667	0.5514	0.613	0.645	0.603133	0.0418667	0.0517333	1.5055	1.449	1.547	1.5005	0.0465	0.0515	1.603	1.56	1.647	1.60333	0.0436667	0.0433333
00:09:00	1.542	1.54	1.444	1.50867	0.0333333	0.0646667	0.162	0.141	0.203	0.168667	0.0343333	0.0276667	0.143	0.14	0.201	0.161333	0.0396667	0.0213333	1.813	1.694	1.818	1.775	0.043	0.081	1.554	1.741	1.579	1.62467	0.116333	0.0706667	0.3204	0.3423	0.5903	0.417667	0.172633	0.0972667	1.4675	1.441	1.539	1.4825	0.0565	0.0415	1.605	1.571	1.649	1.60833	0.0406667	0.0373333
00:10:00	1.516	1.552	1.463	1.51033	0.0416667	0.0473333	0.141	0.121	0.146	0.136	0.01	0.015	0.1275	0.1265	0.155333	0.136444	0.0188889	0.00994444	1.83	1.709	1.834	1.791	0.043	0.082	1.573	1.756	1.593	1.64067	0.115333	0.0676667	0.1744	0.17	0.463	0.269133	0.193867	0.0991333	1.4385	1.432	1.53	1.46683	0.0631667	0.0348333	1.613	1.568	1.657	1.61267	0.0443333	0.0446667
00:11:00	1.564	1.553	1.4289	1.5153	0.0487	0.0864	0.127	0.116	0.125	0.122667	0.00433333	0.00666667	0.1195	0.1195	0.130333	0.123111	0.00722222	0.00361111	1.844	1.72	1.848	1.804	0.044	0.084	1.593	1.77	1.598	1.65367	0.116333	0.0606667	0.1714	0.156	0.4347	0.254033	0.180667	0.0980333	1.4385	1.4	1.5195	1.45267	0.0668333	0.0526667	1.614	1.564	1.658	1.612	0.046	0.048
00:12:00	1.5632	1.547	1.4331	1.51443	0.0487667	0.0813333	0.118	0.116	0.118	0.117333	0.000666667	0.00133333	0.1165	0.1165	0.12	0.117667	0.00233333	0.00116667	1.853	1.73	1.86	1.81433	0.0456667	0.0843333	1.614	1.781	1.59	1.66167	0.119333	0.0716667	0.1674	0.123	0.356	0.215467	0.140533	0.0924667	1.4385	1.402	1.5195	1.45333	0.0661667	0.0513333	1.615	1.563	1.659	1.61233	0.0466667	0.0493333
00:13:00	1.5633	1.545	1.4378	1.51537	0.0479333	0.0775667	0.117	0.117	0.118	0.117333	0.000666667	0.000333333	0.117	0.117	0.118	0.117333	0.000666667	0.000333333	1.859	1.74	1.871	1.82333	0.0476667	0.0833333	1.634	1.791	1.585	1.67	0.121	0.085	0.1624	0.109	0.231	0.167467	0.0635333	0.0584667	1.4385	1.402	1.5195	1.45333	0.0661667	0.0513333	1.614	1.562	1.658	1.61133	0.0466667	0.0493333
00:14:00	1.5639	1.544	1.436	1.51463	0.0492667	0.0786333	0.117	0.117	0.118	0.117333	0.000666667	0.000333333	0.117	0.117	0.118	0.117333	0.000666667	0.000333333	1.863	1.747	1.881	1.83033	0.0506667	0.0833333	1.66	1.799	1.587	1.682	0.117	0.095	0.1624	0.108	0.15	0.140133	0.0222667	0.0321333	1.4385	1.402	1.5195	1.45333	0.0661667	0.0513333	1.609	1.552	1.653	1.60467	0.0483333	0.0526667
00:15:00	1.5636	1.5	1.474	1.51253	0.0510667	0.0385333	0.117	0.117	0.119	0.117667	0.00133333	0.000666667	0.117	0.117	0.119	0.117667	0.00133333	0.000666667	1.73	1.752	1.891	1.791	0.1	0.061	1.677	1.806	1.587	1.69	0.116	0.103	0.1624	0.107	0.098	0.122467	0.0399333	0.0244667	1.4385	1.402	1.5195	1.45333	0.0661667	0.0513333	1.606	1.553	1.65	1.603	0.047	0.05

## Sheet: Supplementary Figure 2b
	Retention Volume	Molecular Weight	log
	20.8	1.35 kDa	0.130334
	17.48	17 kDa	1.23045
	15.52	31.4 kDa	1.49705	Cph001
	15.23	44 kDa	1.64345
	12.38	158 kDa	2.19866
	9.37	670 kDa	2.82607

## Sheet: Supplementary Figure 3
	Supplementary Figure 3a	Triplicate
	Concentration of CMN IIA [mM]	1	2	3
	6	0.000326332	0.000451436	0.000377667
	4	0.000329401	0.000440244	0.000431962
	2	0.000330424	0.000429051	0.000423313
	1	0.000228807	0.000264892	0.000355084
	0.7	0.000205279	0.000221987	0.000226312
	0.5	0.000124463	0.000189653	0.000159523
	0.4	7.12678e-05	0.000120632	0.000118682
	Supplementary Figure 3b	Triplicate
	Concentration of CMN IIA [mM]	1	2	3
	6	0.000240193	0.000231971	0.000182957
	4	0.000174419	0.000226685	0.000205725
	2	0.000201433	0.000200258	0.00018255
	1	0.000123326	0.000120977	0.000106521
	0.7	9.51374e-05	7.69321e-05	6.95235e-05
	0.5	6.63613e-05	7.34085e-05	7.76549e-05
	0.4	5.81395e-05	4.99178e-05	4.22833e-05
	Supplementary Figure 3c	Triplicate
	Concentration of ATP [mM]	1	2	3
	0.8	0.000769027	0.000734672	0.000803383
	0.6	0.000750529	0.000795455	0.000782241
	0.4	0.000520613	0.000692389	0.000866808
	0.2	0.000681818	0.000747886	0.000816596
	0.1	0.00047833	0.000581395	0.000769027
	0.05	0.000446617	0.000425476	0.00054704
	0.03	0.000256342	0.000216702	0.000235201
	0.01	6.34249e-05	0.000116279	9.77801e-05
	Supplementary Figure 3d	Triplicate
	Concentration of GTP [mM]	1	2	3
	0.8	0.00080074	0.000866808	0.000983087
	0.6	0.000975159	0.000792812	0.000546159
	0.4	0.000840381	0.000803383	0.000778717
	0.2	0.000301268	0.000465116	0.000475687
	0.1	0.000356765	0.000274841	0.000355884
	0.05	0.00022463	0.00021494	0.000292459
	0.03	0.000105708	5.63777e-05	0.000348837
	0.01	0.000132135	9.51374e-05	0.000102185
